# Supplementary material for: CTAB assisted hydrothermal synthesis of oxygen vacancy enriched BiVO4 for enhanced photocatalytic hydrogen production
Source: Royal Society of Chemistry journal article supplement (doi:10.1039/d4ce01284d), 2025-01-01
Supplement: d4ce01284d1.pdf [file d4ce01284d1.pdf]

## Supporting Information

### CTAB Assisted Hydrothermal Synthesis of Oxygen Vacancy Enriched $\text{BiVO}_4$ for Enhanced Photocatalytic Hydrogen Production

Qingan Sun, Fen Qiao, Taihang Zhou

School of Energy & Power Engineering, Jiangsu University, Zhen Jiang, 212031,

P.R.China

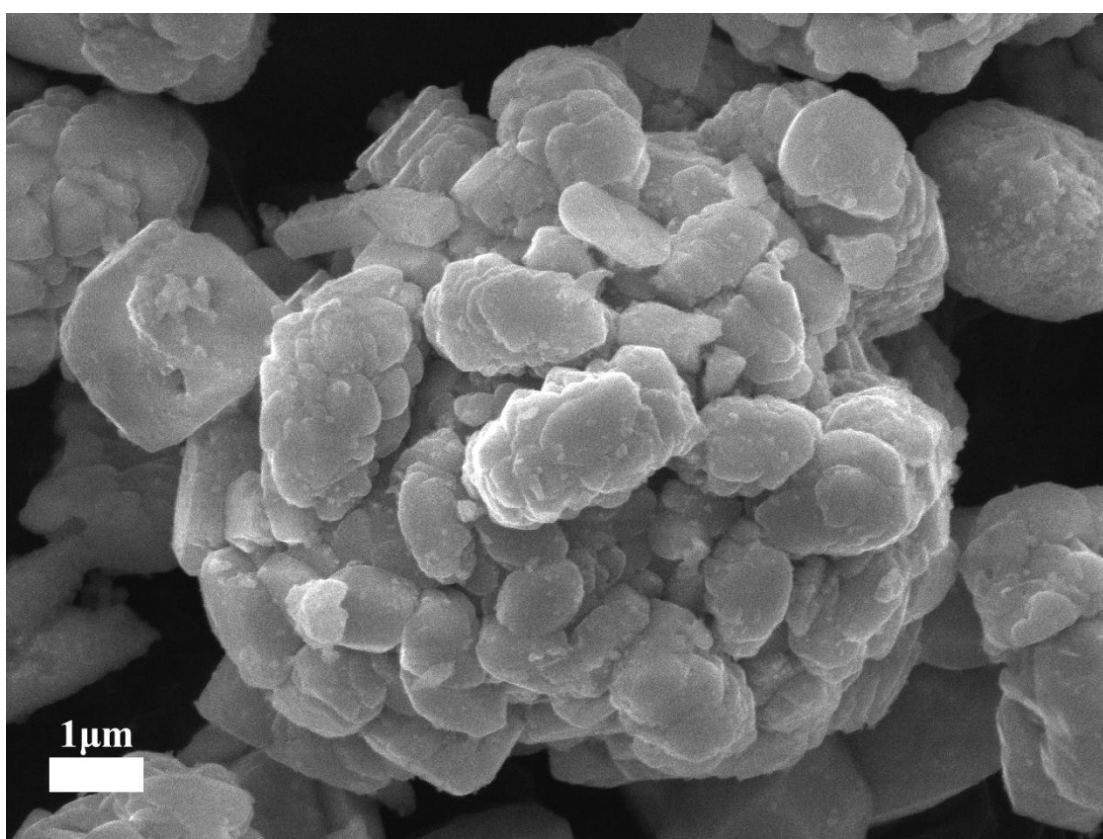

**Figure S1** SEM images of BVO sample.

The morphology of  $\text{BiVO}_4$  samples without CTAB was characterized by scanning electron microscopy (SEM), as shown in Figure S1. The microstructure of BVO samples appears as rough spheres with a size of approximately 6-7 $\mu\text{m}$ , which can be clearly observed to be composed of small balls with a size of approximately 1-2 $\mu\text{m}$ .
